1 **Cell culture model system utilizing engineered A549 cells to express high levels of**  
2 **ACE2 and TMPRSS2 for investigating SARS-CoV-2 infection and antivirals**

3

4 Ching-Wen Chang<sup>a#\*</sup>, Krishna Mohan Parsi<sup>b#</sup>, Mohan Somasundaran<sup>c</sup>, Emma Vanderleeden<sup>a</sup>  
5 John Cruz<sup>d</sup>, Alyssa Cousineau<sup>b</sup>, Ping Liu<sup>a</sup>, Qi Li<sup>c</sup>, Yang Wang<sup>e</sup>, Rene Maehr<sup>b</sup>, Jennifer P.  
6 Wang<sup>a</sup>, Robert W. Finberg<sup>a+</sup>

7

8 <sup>a</sup>Department of Medicine, University of Massachusetts Chan Medical School, Worcester,  
9 Massachusetts, USA

10 <sup>b</sup>Diabetes Center of Excellence and Program in Molecular Medicine, University of  
11 Massachusetts Chan Medical School, Worcester, Massachusetts, USA

12 <sup>c</sup>Department of Biochemistry and Molecular Biotechnology, University of Massachusetts Chan  
13 Medical School, Worcester, Massachusetts, USA

14 <sup>d</sup>Department of Pathology, University of Massachusetts Chan Medical School, Worcester,  
15 Massachusetts, USA

16 <sup>e</sup>MassBiologics, University of Massachusetts Medical School, Boston, Massachusetts, USA

17

18 <sup>#</sup>Those authors contributed equally to this work

19 <sup>+</sup>Senior author

20

21 <sup>\*</sup>Corresponding author.

22 Email addresses: [chingwen.chang4@umassmed.edu](mailto:chingwen.chang4@umassmed.edu) (C.W. Chang)

23

24 Note:

25 This paper is dedicated to the memory of Professor Robert W. Finberg. Dr. Finberg passed away  
26 unexpectedly during the preparation of the manuscript.

27 **Abstract**

28

29 Novel pathogenic severe acute respiratory syndrome coronavirus 2 (SARS-CoV-2)  
30 continues to pose an imminent global threat since its initial outbreak in December 2019.  
31 A simple in vitro model system using cell lines highly susceptible to SARS-CoV-2  
32 infection are critical to facilitate the study of the virus cycle and to discover effective  
33 antivirals against the virus. Human lung alveolar A549 cells are regarded as a useful and  
34 valuable model for respiratory virus infection. However, SARS-CoV-2 uses the ACE2 as  
35 receptor for viral entry and the TMPRSS2 to prime the Spike protein, both of which are  
36 negligibly expressed in A549 cells. Here, we report the generation of a robust human  
37 lung epithelial cell-based model by transducing ACE2 and TMPRSS2 into A549 cells  
38 and show that the ACE2 enriched A549<sup>ACE2/TMPRSS2</sup> cells (ACE2plus) and its single-cell-  
39 derived subclone (ACE2plusC3) are highly susceptible to SARS-CoV-2 infection. These  
40 engineered ACE2plus showed higher *ACE2* and *TMPRSS2* mRNA expression levels than  
41 currently used Calu3 and commercial A549<sup>ACE2/TMPRSS2</sup> cells. ACE2 and TMPRSS2  
42 proteins were also highly and ubiquitously expressed in ACE2plusC3 cells. Additionally,  
43 antiviral drugs like Camostat mesylate, EIDD-1931, and Remdesivir strongly inhibited  
44 SARS-CoV-2 replication. Notably, multinucleated syncytia, a clinical feature commonly  
45 observed in severe COVID-19 patients was induced in ACE2plusC3 cells either by virus  
46 infection or by overexpressing the Spike proteins of different variants of SARS-CoV-2.  
47 Syncytial process was effectively blocked by the furin protease inhibitor, Decanoyl-  
48 RVKR-CMK. Taken together, we have developed a robust human A549 lung epithelial  
49 cell-based model that can be applied to probe SARS-CoV-2 replication and to facilitate  
50 the discovery of SARS-CoV-2 inhibitors.

51

52

53

54

55

56

57

58

59

60

## 61 1. Introduction

62

63 COVID-19 disease caused by the SARS-CoV-2 virus posed a global threat by infecting more  
64 than 250 million people and over 5 million deaths to date since its first outbreak in December  
65 2019 (Li et al., 2021). Although SARS-CoV-2 infects various tissue types of the human body, the  
66 destruction of lung epithelial cells and the deregulated immune system led to acute respiratory  
67 distress syndrome (ARDS) and multi-organ failure in severe COVID-19 patients (Zaim et al.,  
68 2020). In addition, CoV-2 is highly contagious compared to other SARS viruses, with increased  
69 mutated variants evolving that are more transmissible and highly infectious (Zeng et al., 2022).  
70 However, the underlying molecular basis of the coronaviral disease pathogenesis remains largely  
71 unknown.

72 The infectivity of the SARS CoV-2 virus highly depends on the host expressing factor,  
73 angiotensin-converting enzyme 2 (ACE2). The SARS-CoV-2 spike glycoprotein protein (S)  
74 interacts with the host ACE2 receptor to initiate S1-S2 cleavage by a cellular transmembrane  
75 serine protease, TMPRSS2. Furthermore, the endosomal proteases release the viral RNA genome  
76 into the host cell (Hoffmann et al., 2020b). Thus, the internalized viral RNA utilizes cellular  
77 protein machinery by countering the antiviral response to successfully replicating in the host cell  
78 (Hoffmann et al., 2020b). Although human stem cell-based lung epithelial CoV-2 model systems  
79 are available, need special expertise in handling cell cultures and are costly to propagate for large-  
80 scale screening applications (Huang et al., 2020). The alternate lung suitable SARS-CoV-2  
81 permissible models, such as A549 or Calu3 cells, lack a homogenous infectious culture system  
82 with an efficient cytopathic syncytia formation, emphasizing a need for an improvised, robust  
83 platform for studying SARS viral biology and therapeutics.

84 In this study, we showed that A549 cells overexpressing ACE2 and TMPRSS2 stable  
85 clone(A549A549ACE2PlusC3) are highly permissible for SARS CoV-2 infection compared to  
86 Calu3 and commercial A549<sup>ACE2+TMPRSS2</sup> cells. Furthermore, SARS CoV-2 infected  
87 A549ACE2PlusC cells showed cytopathic spike mediated syncytia formation, effectively blocked  
88 using Decanoyl-RVKR-CMK inhibitor. The consistent expression of SARS-CoV-2 host factors  
89 and the homogenous viral infection in A549ACE2PlusC3 cells can be an alternative improved *in*  
90 *vitro* disease modeling platform for drug discovery and host-viral interaction studies. Thus,  
91 A549ACE2PlusC3 cells can be a valuable resource for the current COVID-19 research  
92 community and utilized for any future challenges from SARS respiratory viruses.

93

94

## 95 2. Materials and methods

### 96 2.1. Virus, cells, plasmids, antibodies, antiviral compound

97 The low-passage SARS-CoV-2 (USA-WA1/2020) and icSARS-CoV-2-mNG viruses were  
98 used in this study. The USA-WA1/2020 strain (NR-52281) was provided by BEI Resources. The  
99 mNeonGreen-labeled strain was received from the World Reference Center for Emerging Viruses  
100 and Arboviruses at the University of Texas Medical Branch. Recombinant virus was prepared  
101 according to previous description (Xie et al., 2020). All work with live SARS-CoV-2 was  
102 performed in a biosafety level 3 laboratory facility (BSL3) by personnel trained to handle BSL3  
103 agents and adhering to necessary Standard Operating Procedures.

104 A549 cells (CCL-185), Calu-3 (HTB-55) and Vero E6 (CRL-1586) were obtained from ATCC.  
105 Commercial cell lines, A549<sup>ACE2</sup> and A549<sup>ACE2/TMPRSS2</sup> were purchased from InvivoGen. 293FT  
106 was a gift from Dr. William McDougall. The cells were cultured at 37 °C in DMEM medium  
107 supplemented with 10% heat-inactivated FBS, 100 U/mL Penicillin, and 1% L-glutamine. A549  
108 cells used for ACE2plus model establishment. Vero E6 used for virus propagation and plaque  
109 assay. 293FT was used for pseudotyped lentivirus package.

110 The plasmid sets for generating SARS-CoV-2 spike pseudotyped virus were provided by the  
111 BEI Resources (N-53816 and NR-53817). The generation of pseudotyped lentiviral particles was  
112 based on the protocol as previous described (Crawford et al., 2020). pcDNA3.3-WA1-SARS2,  
113 pcDNA3.3-Alpha-SARS2, pcDNA3.3-Beta-SARS2, pcDNA3.3-Delta-SARS2 were gifts from  
114 David Nemazee (Addgene plasmid #170442, #170451, #170449, 172320). pcDNA3.1-Omicron-  
115 SARS2 (# MC0101274) was purchased from GenScript. pHAGE-EF1a-ACE2PGK-puroR  
116 (internal ID 55490) and pHAGE-EF1a-TMPRSS2-PGK-puroR (internal ID 11816) plasmids  
117 were from hOrfeome 5.1 collection in the Maehr lab.

118 ACE2 and TMPRSS2 antibodies were purchased from R&D SYSTEMS (AF933) and Santa  
119 Cruz (sc-515727). Antiviral compounds Remdesivir and EIDD-193 were purchased from  
120 MedChemExpress (Monmouth Junction, NJ). Decanoyl-RVKR-CMK was purchased from  
121 TOCRIS (#3501). Camostat mesylate was purchased from Millipore Sigma (#SML0057). The  
122 test compounds were solubilized in DMSO to yield 10 mM stock solutions for cell culture  
123 studies.

### 124 2.2. Generation of A549<sup>43,20</sup>, A549<sup>ACE2plus</sup>, A549<sup>ACE2plusC3</sup> cells

125 A549 cells were first transduced with human ACE2-expressing lentivirus (~2 x 10<sup>5</sup> CFU/ml)  
126 and selected with 1ug/ml of puromycin as previous described (Koupenova et al., 2021). Next, the  
127 puromycin-resistant cells were further transduced with human TMPRSS2-expressing lentivirus



128 (~5 x 10<sup>5</sup> CFU/ml) to ensure that all cells get transduced. Over 50 single clones were selected  
129 through limiting dilution and tested for their permissiveness to SARS-CoV-2 infection. Of them,  
130 the clone 43.20 with the most efficient SARS-CoV-2 infection (~20%). To improve the  
131 infectivity, the cell populations with a higher ACE2 expression in clone 43.20 were FACS sorted  
132 using ACE2-specific antibody (AF933, R&D Systems). After puromycin selection, the infectivity  
133 significantly increased up to 40~60%. Single-cell sorting was further applied to generate  
134 ACE2plusC3 subclone that produces a homogeneous cell population. ACE2plusC3 showed stable  
135 and high levels of ACE2 and TMPRSS2 expression throughout the low- to high-passage cell  
136 culture numbers without adding puromycin in the growth medium.

### 137 *2.3. RNA isolation and RT-qPCR*

138 RNA was isolated from virus-containing medium or cell lysates using TRIzol LS  
139 (ThermoFisher Scientific, #10296010) according to the manufacturer's instructions and stored at -  
140 80°C for RT-qPCR. Isolated viral RNA, its expression level was quantified using QuantiFast  
141 Pathogen RT-PCR Kit (Qiagen, #211352) and 2019-nCoV RUO Kit (IDT, #10006713). The  
142 cycling conditions were followed as the protocol recommended by the manufacturer. Isolated  
143 cellular RNA was used for cDNA synthesis using QuantiTect Reverse Transcription Kit (Qiagen,  
144 #205311). The resultant cDNAs were used to measure mRNA expression levels of ACE2 and  
145 TMPRSS2 by qPCR with gene-specific primers (human ACE2, sense 5'-  
146 GGGATCAGAGATCGGAAGAAGAAA-3' and antisense 5'-  
147 AGGAGGTCTGAACATCATCAGTG-3'; human TMPRSS2, sense 5'- AATCGGTGTGT  
148 TCGCCTCTAC-3' and antisense 5' CGTAGTTCTCGTTCCAGTCGT-3') and SYBR Green  
149 reagent. GAPDH was used as an endogenous control gene.

### 150 *2.4. Plaque assay*

151 Approximately 2×10<sup>5</sup> Vero E6 cells were seeded to each well of 12-well plates and cultured at  
152 37 °C, 5% CO<sub>2</sub> for 18 h. The virus was serially diluted in MEM with 3% FBS for in vitro-  
153 generated samples, and 300 µl was transferred to the monolayers. The viruses were incubated  
154 with the cells at 37 °C with 5% CO<sub>2</sub> for 1 h. After that, the virus-containing medium was  
155 removed and added an overlay medium to the infected cells per well. The overlay medium  
156 contained MEM with 0.42% BSA, 20mM HEPES, 0.24% NaHCO<sub>3</sub> and 0.7% agarose (Oxoid,  
157 LP0028). After a 3-day incubation, plates were fixed with 4% PFA overnight and stained with  
158 crystal violet solution (Sigma-Aldrich) the next day. Plaques were counted on a lightbox.

### 159 *2.5. Immunofluorescence staining*

160 Cells were plated on 96-well tissue culture plates (black polystyrene microplates, Corning) and  
161 infected with the low passage of SARS-CoV2 or iscSARS-CoV2-mNG at indicated MOI and  
162 infection period. Infected cells were fixed with 4% paraformaldehyde for 30 min at room  
163 temperature, gently washed 2x in PBS, and permeabilized with 1% Triton X-100 in PBS, and  
164 blocked with 5% BSA. Fixed cells were either labeled with a human monoclonal antibody  
165 conjugated with Alexa-488 against the spike antigen (10.1371/journal.pmed.0030237) or a mouse  
166 monoclonal antibody that recognizes the NP antigen (SinoBiological, #40143-MM08) by  
167 incubation for 2 hours at 4 °C. After washing with saline-Tween 20 (0.05%), the cells were  
168 labeled with an anti-mouse goat secondary antibody conjugated with Alexa-594 by incubation for  
169 1 h at 4 °C. To visualize the cell nuclei, the cells were counterstained with 4',6-diamidino-2-  
170 phenylindole (DAPI) (Abcam) for 15 min at 4 °C to visualize the cell nuclei. The images were  
171 acquired with the ImageXpress Micro-XL (IXM) system by immunofluorescence with 4x or 10x  
172 objectives. The images were processed using MetaXpress Software.

173 For cell fusion assay, cells were plated on regular 24-well tissue culture plates for overnight to  
174 reach 90% confluence, 1ug of spike plasmid for each well was transfected into cells using  
175 transfection reagent (Mirus, TransIT-LT1) with adding DMSO or antiviral compounds for 24  
176 hours. Transfected cells were then fixed and counterstained with DAPI. The entire plate was  
177 scanned with the Celigo Image Cytometer (Nexcelom Bioscience) and analyzed by Celigo  
178 Software.

### 179 *2.6. Luciferase assay and Cytotoxicity*

180 The SARS-CoV-2 spike pseudotyped virus activity was determined by bright-glo luciferase  
181 assay (Promega). The plate reader detected the luminescence two days post virus infection or  
182 without virus infection. Cell death was measured by a cytotoxicity detection kit (LDH) from  
183 Roche to assess lactate dehydrogenase activity in the culture supernatants of ACE2plus cells.

### 184 *2.7. Statistical analyses*

185 Data are expressed as means  $\pm$  standard deviations (SD), and the significance of differences  
186 between groups was evaluated using ANOVA with Dunnett's multiple comparisons test. All tests  
187 were performed using Prism 9 (GraphPad Software).

188

## 189 **3. Results**

### 190 *3.1 Establishment of the ACE2plus cell model*

191 To establish a robust human A549-based cell line for SARS-CoV-2 investigation, we first  
192 transduced lentiviral ACE2 and TMPRSS2 genes sequentially into A549 cells (Figure 1A).

193 Following puromycin selection, over 50 clones were tested by SARS-CoV-2 virus infection.  
194 Clone 43.20 exhibited a higher infectivity rate of approximately 20% and was therefore selected  
195 for further ACE2 receptor enrichment by cell sorting. The sorted cell population with a high level  
196 of ACE2 expression was then referred to as ACE2plus and exhibited permissibility to SARS-  
197 CoV-2 virus replication (Figure 1B). By contrast, the parental 43.20 clone showed low levels  
198 (Figure 1C). Next, we conducted further SARS-CoV-2 infections to compare both clones with  
199 different MOIs and seeded cell numbers. Infected cells were identified by spike antibody. Images  
200 were analyzed to quantify infectivity as described in materials and methods. As Figure 1D shown,  
201 ACE2plus cells were more permissive than the parental 43.20 cells and showed higher infectivity  
202 even during low MOI virus infections, indicating that the ACE2plus model is highly susceptible  
203 to SARS-CoV-2 viral infection.

204 To further determine the ACE2plus model's permissibility, we performed a comparative  
205 infection in ACE2plus and Vero E6 cells with SARS-CoV-2 virus (WA1/2020) and recombinant  
206 virus (icSARS-CoV-2mNG). Both cell types were infected with WA1/2020 (wild-type),  
207 WA1/2020 (mNG), or control growth medium (mock-infected) at low MOIs 0.05 and 0.1. Wild-  
208 type infected ACE2plus cells exhibited infection rates of approximately 60%, while Vero E6 cells  
209 showed infectivity rates around 70% (Figure 1E). ACE2plus cells exhibited a range of infectivity  
210 from approximately 60-70% across the two MOIs when infected with icSARS-CoV-2mNG,  
211 while Vero E6 cells expressed between 70-80% infectivity. To quantify viral nucleoprotein RNA  
212 levels, RT-qPCR was conducted. At 48 hours post-infection, supernatants were collected from  
213 cells treated with MOI 0.1 wild-type virus and icSARS-CoV-2-mNG, as well as mock-infected,  
214 and processed for RNA extraction. Vero E6 cells showed 1.75 fold higher infectivity than  
215 ACE2plus when treated with wild-type virus and approximately 1.2 fold higher infectivity than  
216 ACE2plus when challenged with icSARS-CoV-2-mNG (Figure 1F). Released virus particles  
217 from infected ACE2plus cells were also tested using plaque assay to determinate the virus activity  
218 (Figure 1G). Altogether, those results demonstrate the comparable efficacy of ACE2plus and  
219 Vero E6 cells as models for SARS-CoV-2 infections and shows that ACE2plus is a viable human  
220 cell model.

### 221 *3.2 Characterization of the ACE2plus cell model in comparison to commercial A549<sup>ACE2/TMPRSS2</sup>* 222 *cells*

223 ACE2 and TMPRSS2 are key receptors for SARS-CoV-2 entry. To measure levels of *ACE2*  
224 and *TMPRSS2* mRNA expression in the ACE2plus model, RT-qPCR was performed on  
225 supernatants collected from ACE2plus, parental A549, Calu3 and two commercial A549<sup>ACE2</sup>

226 (IVG-A), A549<sup>ACE2/TMPRSS2</sup> cell lines (IVG-AT). Relative mRNA expression was normalized to  
227 housekeeping gene GAPDH. *ACE2* mRNA expression levels in ACE2plus and IVG-AT cells  
228 were similar (Figure 2A). However, ACE2plus cells expressed a higher level of *TMPRSS2*  
229 mRNA than IVG-AT and Calu3. Both gene expressions in parental A549 are extremely low.  
230 Next, we used flow cytometry on ACE2plus and IVG-AT cells to determine the cell-surface  
231 ACE2 protein expression. As expected, the ACE2plus cell population showed > 95% expression  
232 of ACE2 while the IVG-AT cells only exhibited 33% expression (Figure 2B). Although the  
233 ACE2 positive population can be increased after drugs selection, the IVG-AT cells grow very  
234 slowly. Thus, cell growth rates were determined by staining ACE2plus and IVG-AT cultures with  
235 DAPI using Celigo imaging and software (Figure 2C) to determine cell count in 24-hour time  
236 increments over a total period of 96 hours. Both cell lines were seeded in a 96-well plate at  $1 \times 10^4$   
237 cells per well. After 24-hour, the ACE2plus cell grows faster and more consistent than the  
238 commercial IVG-AT cell line.

239 Considering cell heterogeneity, we further optimized the ACE2plus model by single-cell  
240 sorting. To do this, the ACE2plus cell was incubated with an ACE2-specific antibody for  
241 Fluorescence Activated Cell Sorting (FACS). We then successfully expanded 23 clones and  
242 challenged them with icSARS-CoV-2-mNG virus to compare the infectivity of each clone (Figure  
243 2D). Of them, clone 3 (ACE2plusC3) was then selected due to its high expression of ACE2 and  
244 less variation among infected cells (data not shown). We then used Immunofluorescence staining  
245 for ACE2 and TMPRSS2 in ACE2plusC3 cells. A549 was used as a staining control. A549 cells  
246 exhibited negligible ACE2 and TMPRSS2, while ACE2plusC3 showed strong and ubiquitous  
247 expression for both (Figure 2E). Next, we examined if the ACE2 receptor on the ACE2plusC3  
248 cell surface can be recognized by SARS-CoV-2 Spike-RBD protein. As Figure 2 F shows,  
249 recombinant RBD proteins can specifically bind to the ACE2 receptor and be internalized rapidly  
250 within 45 minutes (data not shown). According to recent reports, spike D614G mutation is  
251 associated with ACE2 receptor binding and results in an increase in infectivity of the SARS-CoV-  
252 2 (Cheng et al.). To test this, the 614D and 614G of Spike-pseudotyped lentiviral particles were  
253 prepared and used for infections. As *luciferase* and *ZsGreen* genes were designed as reporters in  
254 the system, the infectivity can be easily measured by ZsGreen protein expression or luciferase  
255 assay (Crawford et al., 2020). As a result, 614G showed stronger infectivity than 614D in a dose-  
256 dependent manner (Figure 2G). This data supports the use of ACE2plusC3 for SARS-CoV-2  
257 lentiviral infection assays. Taken together, those results provide evidence that the ACE2plus cell  
258 line is an ideal model for the SARS-CoV-2 study.

### 259 3.3 SARS-CoV-2-Spike-mediated cell-cell fusion

260 Cell-cell fusion allows viruses to infect neighboring cells, and it was recently discovered that  
261 the polybasic S1/S2 site of SARS-CoV-2 Spike is required for efficient infection of human lung-  
262 derived cells and promotes syncytium formation (Cheng et al., 2020; Hoffmann et al., 2020a).  
263 Thus, it might be essential to understand the ability of syncytium formation between SARS-CoV-  
264 2 spike variants, as the large size of syncytia is reported to constitute a hallmark of COVID-19-  
265 associated pathology (Bussani et al., 2020). To address this, we first established a mCherry stable  
266 cell line using the ACE2plusC3 model. After sorting, over 98% of cells express mCherry protein,  
267 and this cell model can be applied to real-time observe the kinetic of spike-mediated cell-cell  
268 fusion without no need to coculture with other cells. Next, we transfected an equal amount of  
269 indicated spike plasmids into ACE2plusC3-mCherry cells for 24 hours. WA1/2020 spike used as  
270 a reference, and pCDNA empty vector acts as a negative control. To visualize and capture whole  
271 well images, an entire 24-well plate was scanned using Celigo Image Cytometer (Figure 3A). As  
272 a result, delta and beta spikes clearly induced giant syncytia formation (> 300uM) with  
273 multinucleated enlarged cells compared with WA1/2020 or alpha spike (Figure 3B). The size and  
274 number of syncytia was dramatically reduced while adding CMK or Camostat inhibitors to  
275 transfected cells. Notably, omicron spike seems to poorly induce cell fusion in ACE2plus-  
276 mCherry cells. Those results indicate that the ACE2plusC2 model can be used to study spike-  
277 mediated cell fusion.

### 278 3.4 Evaluation of the antivirals against SARS-CoV-2 using ACE2plusC3 cell culture model.

279 To test the utility of the ACE2plus model in anti-viral drug screening, we evaluated the  
280 efficacy of Camostat mesylate, EIDD-1931, and Remdesivir in inhibiting SARS-CoV-2 infection.  
281 ACE2plusC3 cells were pretreated with drugs for one hour prior to infection. Then cells were  
282 infected with icSARS-CoV-2-mNG at MOI 0.1. After 48 hours, supernatants were collected for  
283 cytotoxicity assay, infected cells were fixed and quantified by IXM image system. Clearly, even  
284 at low concentration of EIDD-1931 (1uM) and Remdesivir (0.1uM) we observed approximately  
285 50% reduction of NP fluorescence (Figure 4). EIDD-1931 and Remdesivir, which target virus  
286 RNA-dependent RNA polymerase, have been reported to be potent antivirals against SARS-CoV-  
287 2 (Miller et al., 2021). Camostat mesylate is regarded as an antiviral agent, as it inhibits many of  
288 the serine proteases that SARS-CoV and SARS-CoV-2 use for virus-to-host cell membrane  
289 fusion, like TMPRSS2, and TMPRSS11 (Breining et al., 2021). As a result, treating cells with  
290 100uM of Camostat mesylate resulted in significant inhibition (Figure 4). This is consistent with

291 recent reports that Camostat mesylate significantly reduced SARS-CoV-2-driven entry and  
292 infection in lung cell line Calu-3 and primary human lung cell (Hoffmann et al., 2020b).

293 To test potential dose-dependent antiviral activity of those drugs in our cell model, we treated  
294 ACE2plusC3 with different concentrations of those drugs and infected the cells with icSARS-  
295 CoV-2-mNG at MOI 0.1. Cells were fixed at 48 hours post-infection and determined the  
296 infectivity as abovementioned. To quantify the inhibition of those drugs, the 48 hour time point  
297 values from two independent experiments (n=6) were plotted on a semi-logarithmic graph to  
298 establish the half-maximal inhibitory concentration value. Camostat mesylate, EIDD-1931, and  
299 Remdesivir exhibited potent antiviral effect with  $IC_{50}$ =59.98 uM, 0.84uM, and 0.14uM,  
300 respectively (Figure 5). No apparent cytotoxic effect was observed in cells. These results  
301 demonstrated that our ACE2plucC3 cell model can be applied for evaluation of antiviral drugs  
302 and might be potentially developed for high-throughput screening.

303 *3.5 Decanoyl-RVKR-CMK inhibits SARS-CoV-2 infection in ACE2plusC3 cells through*  
304 *suppressing spike-mediated cell fusion*

305 In the transfection experiments, we found that the spike-mediated cell fusion was reduced by  
306 treatment with furin inhibitor Decanoyl-RVKR-CMK (Figure 3B). Because several reports have  
307 demonstrated that the cleavage of the SARS-CoV-2 spike protein at a putative furin cleavage site  
308 (RRARS) at R685/S686 is critical for spike-mediated cell-cell fusion (Cheng et al.; Cheng et al.,  
309 2020; Hoffmann et al., 2020a). We also observed extensive syncytial phenotype in SARS-CoV-2-  
310 infected ACE2plus cells. We next investigated the efficacy of the furin inhibitor Decanoyl-  
311 RVKR-CMK to determine whether the furin protease is required for syncytium formation in  
312 ACE2plucC3 cells. To do this, cells were infected with SARS-CoV-2 (WA1/2020) at MOI 0.1  
313 and inoculated with a range of concentrations of Decanoyl-RVKR-CMK for 36 hours before  
314 staining for DAPI and nucleocapsid protein expression. Mock-treated cells were infected with the  
315 virus and received no drug inoculation. In a concentration-dependent manner, cytotoxicity effects  
316 were not observed. (Figure 6D). As a result, syncytia formation were markedly observed in virus-  
317 infected cells, and the syncytial phenotype and infected cells were less clearly prominent in the  
318 presence of the CMK furin inhibitor (Figure 6A, 6B). To quantify the syncytia number, each  
319 image captured from 4x object was analyzed based on the size (> 100uM) and the number of  
320 nuclei (> 5). As Fig 6C shown, the syncytia number is significantly reduced by CMK inhibitor.  
321 To further test inhibition of viral infection in these samples, plaque assays were performed on  
322 Vero E6 cells with supernatants collected at 36 hours post-infection. The virus activity was  
323 inhibited in CMK-treated samples (Figure 6E). Besides, mock-treated samples had a virus titer of



324 approximately  $1.75 \times 10^5$  plaque-forming units per mL (PFU/mL), and decreased to  $0.8 \times 10^5$   
325 PFU/mL in the 100uM CMK-treated samples (Figure 6F). Thus, the furin-dependent process  
326 possibly contributes to syncytium formation in ACE2plusC3 cells.

327

#### 328 4. Discussion

329 The current pandemic caused by SARS-CoV2 is completing its second year of global  
330 devastation of human lives. While novel vaccine strategies have provided imminent protection  
331 and slowed the pace of spreading infection, this approach has been seriously challenged by newly  
332 emerging variants. There is critical need for effective antivirals along with the current vaccine  
333 strategy to successfully combat this as well as newly emerging pandemics caused by respiratory  
334 viruses. A reliable cell model that reproduces the SARS-CoV-2 life cycle is therefore required to  
335 help us better understand the virus-host interactions and to discover novel antiviral drugs. Studies  
336 have shown that ACE2 receptor is considered essential for SARS-CoV-2 entry, and the serine  
337 protease TMPRSS2 for spike protein priming and spike-mediated cell fusion (Hoffmann et al.,  
338 2020b). Since the outbreak of the COVID-19 pandemic, many efforts have been focused on to  
339 establish various cell models to perform relevant in vitro studies. Several commonly used cell  
340 lines such as 293<sup>ACE2</sup> and Vero E6 have been widely utilized for studying SARS-CoV-2 virus  
341 entry, replication, and antivirals (Cheng et al., 2020; Hoffmann et al., 2020b; Zeng et al., 2022).  
342 However, they may not be suitable cell models to investigate the pathological mechanism of the  
343 host cell in response to the virus infection, as they were not derived from human lung tissue and  
344 lack cytopathic effect (CPE) as well as type I interferon genes expression (Osada et al., 2014). To  
345 address this, we systematically developed a highly permissive human lung-based ACE2plus cell  
346 model which originated from human lung epithelial cell line A549. By comparing to other cell  
347 lines used for susceptibility to SARS-CoV2 infection and replication, ACE2plus expressed a  
348 higher level of *ACE2* and *TMPRSS2* than Calu3 and IVG-AT (A549<sup>ACE2/TMPRSS2</sup>, InvivoGen) and  
349 showed a faster and more consistent growth rate than the commercial IVG-AT cell line,  
350 indicating that it is an easily manipulated cell model for large-scale screening applications.

351 As ACE2plusC3 was derived from a single cell colony, with homogenous population, it is  
352 ubiquitously expressed ACE2 and TMPRSS2 proteins. In this study, we evaluated the longevity  
353 of the ACE2plusC3 model's susceptibility to SARS-CoV-2 infection using passage 16~18 of  
354 cells, they exhibited similar infectivity levels of 70~80% as early passage of ACE2plusC3 cells.  
355 We also evaluated the sensitivity of ACE2plusC3 model for SARS-CoV-2 antivirals using  
356 Camostat mesylate and two FDA-approved drugs, Remdesivir and EIDD-1931(molnupiravir's



357 active metabolite), our results showed potent antiviral effect with  $IC_{50}=59.98$  uM,  $IC_{50}=0.14$ uM,  
358 and  $IC_{50}=0.84$ uM, respectively. We noticed that there is a comparative data of the Remdesivir  
359  $IC_{50}$  in different cell lines. For example, the reference drug Remdesivir has been showed  
360 differences in  $IC_{50}$  in between Vero ( $IC_{50}=10$ uM) and Calu-3 ( $IC_{50}=1.3$  uM) cells (Jang et al.,  
361 2021; Ko et al., 2021). This indicates that our ACE2plusC3 is a more sensitive cell model and  
362 better than Vero cells for developing an antiviral screening assay.

363 Furthermore, we clearly observed the syncytium formation in cells infected with wild type  
364 WA01/2020 strain. Syncytia were also evident in ACE2plusC3 cells transduced with different  
365 variants of Spike proteins. We found that the beta- and delta-Spike both had stronger fusogenic  
366 activity than WA1/2020 and others. Notably, extensive cell fusion caused by the delta Spike led  
367 to giant syncytium formation and induce cell death. By contrast, cell-cell fusion was barely  
368 observed with overexpressed omicron Spike at the same condition. Our results are in line with  
369 recent reports that show delta-Spike possess higher fusion activity and syncytium formation  
370 ability than the parent WA1/2020, and thus likely induced cell-cell fusion in the respiratory tract  
371 to cause severe pathogenicity reported in infected individuals (Mlcochova et al., 2021). Although  
372 very little is understood about the omicron variant, the severity of disease is reportedly much less  
373 than the delta variant. Our results strongly suggested that the Omicron spike protein induced  
374 relatively poor cell fusion similar to recent reports in 293<sup>ACE2</sup> and VeroE6<sup>TMPRSS2</sup> cells (Meng et  
375 al., 2021; Zhao et al., 2021).

376 Coexpression of ACE2 and TMPRSS2 strongly correlates with the virus susceptibility and  
377 cell-to-cell infection. In addition to the Spike protein inducing cell-cell fusion, furin and  
378 TMPRSS2 play important roles in this process of spike-mediated cell fusion (Hoffmann et al.,  
379 2020b). In this report, using furin convertase inhibitor, we have provided evidence that the  
380 relatively robust cell infection efficiency of SARS-CoV-2 in ACE2plus is most likely dependent  
381 on its higher cell fusion capability (compared to the DMSO treatment). However, we cannot  
382 exclude the possibility that other molecules are involved in viral recognition and entry. Further  
383 investigation is warranted to identify and tease out the exact roles played by these factors.  
384 Overall, we have established a robust human lung-based cell model for SARS-CoV-2 infection.  
385 Our data on SARS-CoV-2 virus production, pseudotyped virus infection, Spike-mediated cell  
386 fusion, and antiviral test highlight the importance of our cell model, which might provide as a  
387 powerful tool to facilitate the study of the emerging SARS-CoV-2 variants.

388

389 **Conflict of interest**

390 The authors declare that they have no known competing financial interests or personal  
391 relationships that could have appeared to influence the work reported in this paper.

392

### 393 **Acknowledgements**

394 This work was supported by the Department of Defense (DoD) COVID-19 Expansion Award  
395 W81XWH2110029 to Dr. Robert W. Finberg. The following reagent was obtained through BEI  
396 Resources, NIAID, NIH: SARS-Related Coronavirus 2, Wuhan-Hu-1 Spike-Pseudotyped  
397 Lentiviral Kit, NR-53816 and NR-53817

398

### 399 **Contributions**

400 C.C. designed research; C.C., K.M.P., E.V., M.S., P.L., and J.C. performed the experiments; Q.  
401 L. and Y. W. prepared anti-spike antibody and tested its specificity. C.C., R.W.F, J.W., R.M,  
402 M.S. analyzed the data; C.C., K.M.P. and E.V. wrote the manuscript.

403

404

405

### 406 **References**

407

408 Breining, P., Frolund, A.L., Hojen, J.F., Gunst, J.D., Staerke, N.B., Saedder, E., Cases-Thomas,  
409 M., Little, P., Nielsen, L.P., Sogaard, O.S., Kjolby, M., 2021. Camostat mesylate against SARS-  
410 CoV-2 and COVID-19-Rationale, dosing and safety. *Basic Clin Pharmacol Toxicol* 128, 204-212.

411

412 Bussani, R., Schneider, E., Zentilin, L., Collesi, C., Ali, H., Braga, L., Volpe, M.C., Colliva, A.,  
413 Zanconati, F., Berlot, G., Silvestri, F., Zacchigna, S., Giacca, M., 2020. Persistence of viral RNA,  
414 pneumocyte syncytia and thrombosis are hallmarks of advanced COVID-19 pathology.  
415 *EBioMedicine* 61, 103104.

416

417 Cheng, Y.-W., Chao, T.-L., Li, C.-L., Wang, S.-H., Kao, H.-C., Tsai, Y.-M., Wang, H.-Y., Hsieh,  
418 C.-L., Lin, Y.-Y., Chen, P.-J., Chang, S.-Y., Yeh, S.-H., Meng, X.-J., D614G Substitution of  
419 SARS-CoV-2 Spike Protein Increases Syncytium Formation and Virus Titer via Enhanced Furin-  
420 Mediated Spike Cleavage. *mBio* 12, 587.

421

422 Cheng, Y.W., Chao, T.L., Li, C.L., Chiu, M.F., Kao, H.C., Wang, S.H., Pang, Y.H., Lin, C.H.,  
423 Tsai, Y.M., Lee, W.H., Tao, M.H., Ho, T.C., Wu, P.Y., Jang, L.T., Chen, P.J., Chang, S.Y., Yeh,  
424 S.H., 2020. Furin Inhibitors Block SARS-CoV-2 Spike Protein Cleavage to Suppress Virus  
425 Production and Cytopathic Effects. *Cell Rep* 33, 108254.

426

427 Crawford, K.H.D., Eguia, R., Dingens, A.S., Loes, A.N., Malone, K.D., Wolf, C.R., Chu, H.Y.,  
428 Tortorici, M.A., Veessler, D., Murphy, M., Pettie, D., King, N.P., Balazs, A.B., Bloom, J.D., 2020.  
429 Protocol and Reagents for Pseudotyping Lentiviral Particles with SARS-CoV-2 Spike Protein for  
430 Neutralization Assays.

431

432 Hoffmann, M., Kleine-Weber, H., Pöhlmann, S., 2020a. A Multibasic Cleavage Site in the Spike  
433 Protein of SARS-CoV-2 Is Essential for Infection of Human Lung Cells. *Molecular cell* 78, 779-  
434 784.e775.  
435  
436 Hoffmann, M., Kleine-Weber, H., Schroeder, S., Krüger, N., Herrler, T., Erichsen, S., Schiergens,  
437 T.S., Herrler, G., Wu, N.-H., Nitsche, A., Müller, M.A., Drosten, C., Pöhlmann, S., 2020b.  
438 SARS-CoV-2 Cell Entry Depends on ACE2 and TMPRSS2 and Is Blocked by a Clinically  
439 Proven Protease Inhibitor. *Cell* 181, 271-280.e278.  
440  
441 Huang, J., Hume, A.J., Abo, K.M., Werder, R.B., Villacorta-Martin, C., Alysandratos, K.-D.,  
442 Beermann, M.L., Simone-Roach, C., Lindstrom-Vautrin, J., Olejnik, J., Suder, E.L., Bullitt, E.,  
443 Hinds, A., Sharma, A., Bosmann, M., Wang, R., Hawkins, F., Burks, E.J., Saeed, M., Wilson,  
444 A.A., Mühlberger, E., Kotton, D.N., 2020. SARS-CoV-2 Infection of Pluripotent Stem Cell-  
445 Derived Human Lung Alveolar Type 2 Cells Elicits a Rapid Epithelial-Intrinsic Inflammatory  
446 Response. *Cell Stem Cell* 27, 962-973.e967.  
447  
448 Jang, W.D., Jeon, S., Kim, S., Lee, S.Y., 2021. Drugs repurposed for COVID-19 by virtual  
449 screening of 6,218 drugs and cell-based assay. *Proc Natl Acad Sci U S A* 118.  
450 Ko, M., Jeon, S., Ryu, W.S., Kim, S., 2021. Comparative analysis of antiviral efficacy of FDA-  
451 approved drugs against SARS-CoV-2 in human lung cells. *J Med Virol* 93, 1403-1408.  
452 Koupenova, M., Corkrey, H.A., Vitseva, O., Tanriverdi, K., Somasundaran, M., Liu, P., Soofi, S.,  
453 Bhandari, R., Godwin, M., Parsi, K.M., Cousineau, A., Maehr, R., Wang, J.P., Cameron, S.J.,  
454 Rade, J., Finberg, R.W., Freedman, J.E., 2021. SARS-CoV-2 Initiates Programmed Cell Death in  
455 Platelets. *Circ Res* 129, 631-646.  
456  
457 Li, J., Lai, S., Gao, G.F., Shi, W., 2021. The emergence, genomic diversity and global spread of  
458 SARS-CoV-2. *Nature* 600, 408-418.  
459 Meng, B., Ferreira, I.A.T.M., Abdullahi, A., Saito, A., Kimura, I., Yamasoba, D., Kemp, S.A.,  
460 Goonawardane, N., Papa, G., Fatihi, S., Rathore, S., Ikeda, T., Toyoda, M., Tan, T.S.,  
461 Kuramochi, J., Mitsunaga, S., Ueno, T., Charles, O.J., Collaboration, C.-N.B.C.-., The Genotype  
462 to Phenotype Japan, C., Ecuador, C.C., Smith, K.G.C., Bradley, J., Choi, J., Madissoon, E.,  
463 Meyer, K., Mlcochova, P., Doffinger, R., Teichmann, S.A., James, L., Lee, J.H., Thukral, L.,  
464 Sato, K., Gupta, R.K., 2021. SARS-CoV-2 Omicron spike mediated immune escape, infectivity  
465 and cell-cell fusion. *bioRxiv*, 2021.2012.2017.473248.  
466  
467 Miller, S.R., McGrath, M.E., Zorn, K.M., Ekins, S., Wright, S.H., Cherrington, N.J., 2021.  
468 Remdesivir and EIDD-1931 Interact with Human Equilibrative Nucleoside Transporters 1 and 2:  
469 Implications for Reaching SARS-CoV-2 Viral Sanctuary Sites. *Mol Pharmacol* 100, 548-557.  
470  
471 Mlcochova, P., Kemp, S.A., Dhar, M.S., et al., The Indian, S.-C.-G.C., The Genotype to  
472 Phenotype Japan, C., The, C.-N.B.C.-C., 2021. SARS-CoV-2 B.1.617.2 Delta variant replication  
473 and immune evasion. *Nature* 599, 114-119.  
474  
475 Osada, N., Kohara, A., Yamaji, T., Hirayama, N., Kasai, F., Sekizuka, T., Kuroda, M., Hanada,  
476 K., 2014. The genome landscape of the african green monkey kidney-derived vero cell line. *DNA*  
477 *Res* 21, 673-683.  
478  
479 Xie, X., Muruato, A., Lokugamage, K.G., Narayanan, K., Zhang, X., Zou, J., Liu, J.,  
480 Schindewolf, C., Bopp, N.E., Aguilar, P.V., Plante, K.S., Weaver, S.C., Makino, S., LeDuc, J.W.,  
481 Menachery, V.D., Shi, P.Y., 2020. An Infectious cDNA Clone of SARS-CoV-2. *Cell Host*  
482 *Microbe* 27, 841-848 e843.

483

484 Zaim, S., Chong, J.H., Sankaranarayanan, V., Harky, A., 2020. COVID-19 and Multiorgan  
485 Response. *Curr Probl Cardiol* 45, 100618.

486

487 Zeng, C., Evans, J.P., King, T., Zheng, Y.-M., Oltz, E.M., Whelan, S.P.J., Saif, L.J., Peeples,  
488 M.E., Liu, S.-L., 2022. SARS-CoV-2 spreads through cell-to-cell transmission. *Proc Natl Acad*  
489 *Sci USA* 119, e2111400119.

490

491 Zhao, H., Lu, L., Peng, Z., Chen, L.-L., Meng, X., Zhang, C., Ip, J.D., Chan, W.-M., Chu, A.W.-  
492 H., Chan, K.-H., Jin, D.-Y., Chen, H., Yuen, K.-Y., To, K.K.-W., 2021. SARS-CoV-2 Omicron  
493 variant shows less efficient replication and fusion activity when compared with delta variant in  
494 TMPRSS2-expressed cells. *null*, 1-18.

495

496

497

498

499

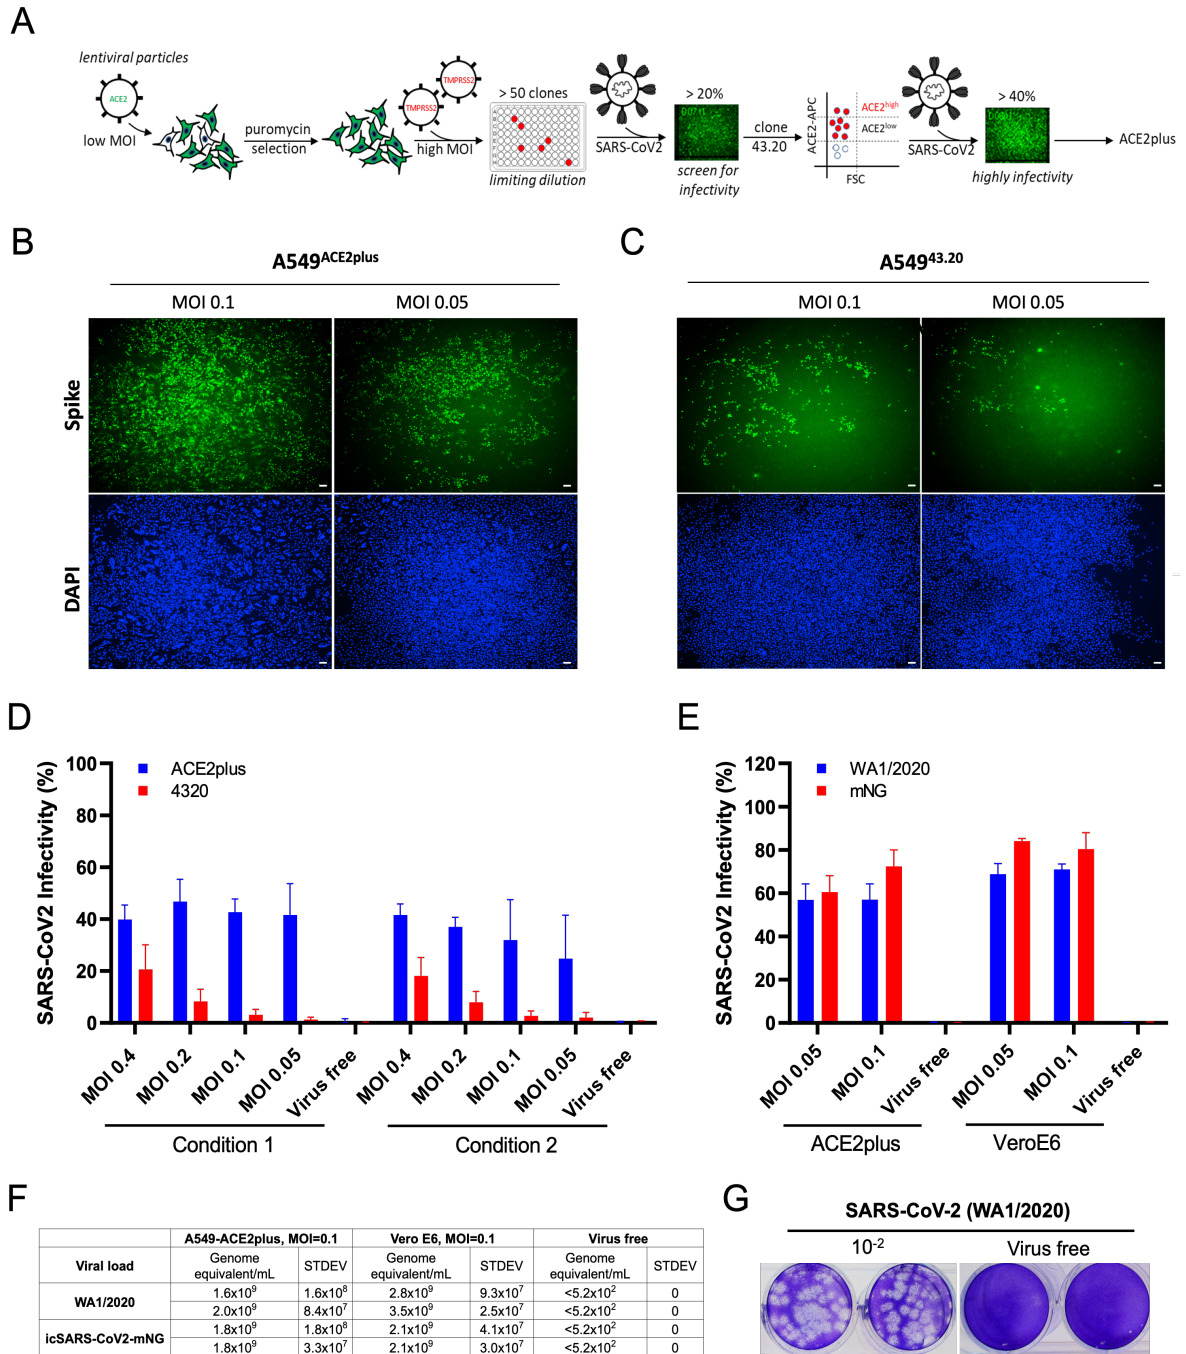

500

501

502

503

504

505

506

507 **Fig. 1. Establishment of highly permissive ACE2plus cell model for SARS-CoV-2**  
508 **replication.** (A) Experimental scheme to establish A549<sup>4320</sup> and A549<sup>ACE2/TMPRSS2</sup> (ACE2plus).  
509 SARS-CoV-2 infection observed in ACE2plus (B) and 43.20 cells (C) at 48 hours post-infection.  
510 Spike-specific antibody was used to detect infected cells; 96-well plates were imaged with the  
511 ImageXpress, 4X magnification, 100uM scale bar. (D) Scanned images were analyzed using  
512 MetaXpress software to determine the infectivity (Spike+ cells were normalized to total cell  
513 number). In condition 1, 20,000 cells per well were seeded in a 96-well plate; 15,000 cells were  
514 seeded in condition 2. (E) ACE2plus shows comparable infectivity to Vero E6 cells while  
515 challenging with SARS-CoV-2 (WA1/2020) or icSARS-CoV2-mNG (WA1/2020). (F, G) Virus-  
516 containing supernatants from infected ACE2plus cells at 48 hours post-infection were collected  
517 and analyzed by RT-qPCR and plaque assay to measure the viral load and viral particles, their  
518 ability to form plaques. The data represent the mean ( $\pm$ SD) from two independent experiments.

519

520

521

522

523

524

525

526

527

528

529

530

531

532

533

534

535

536

537



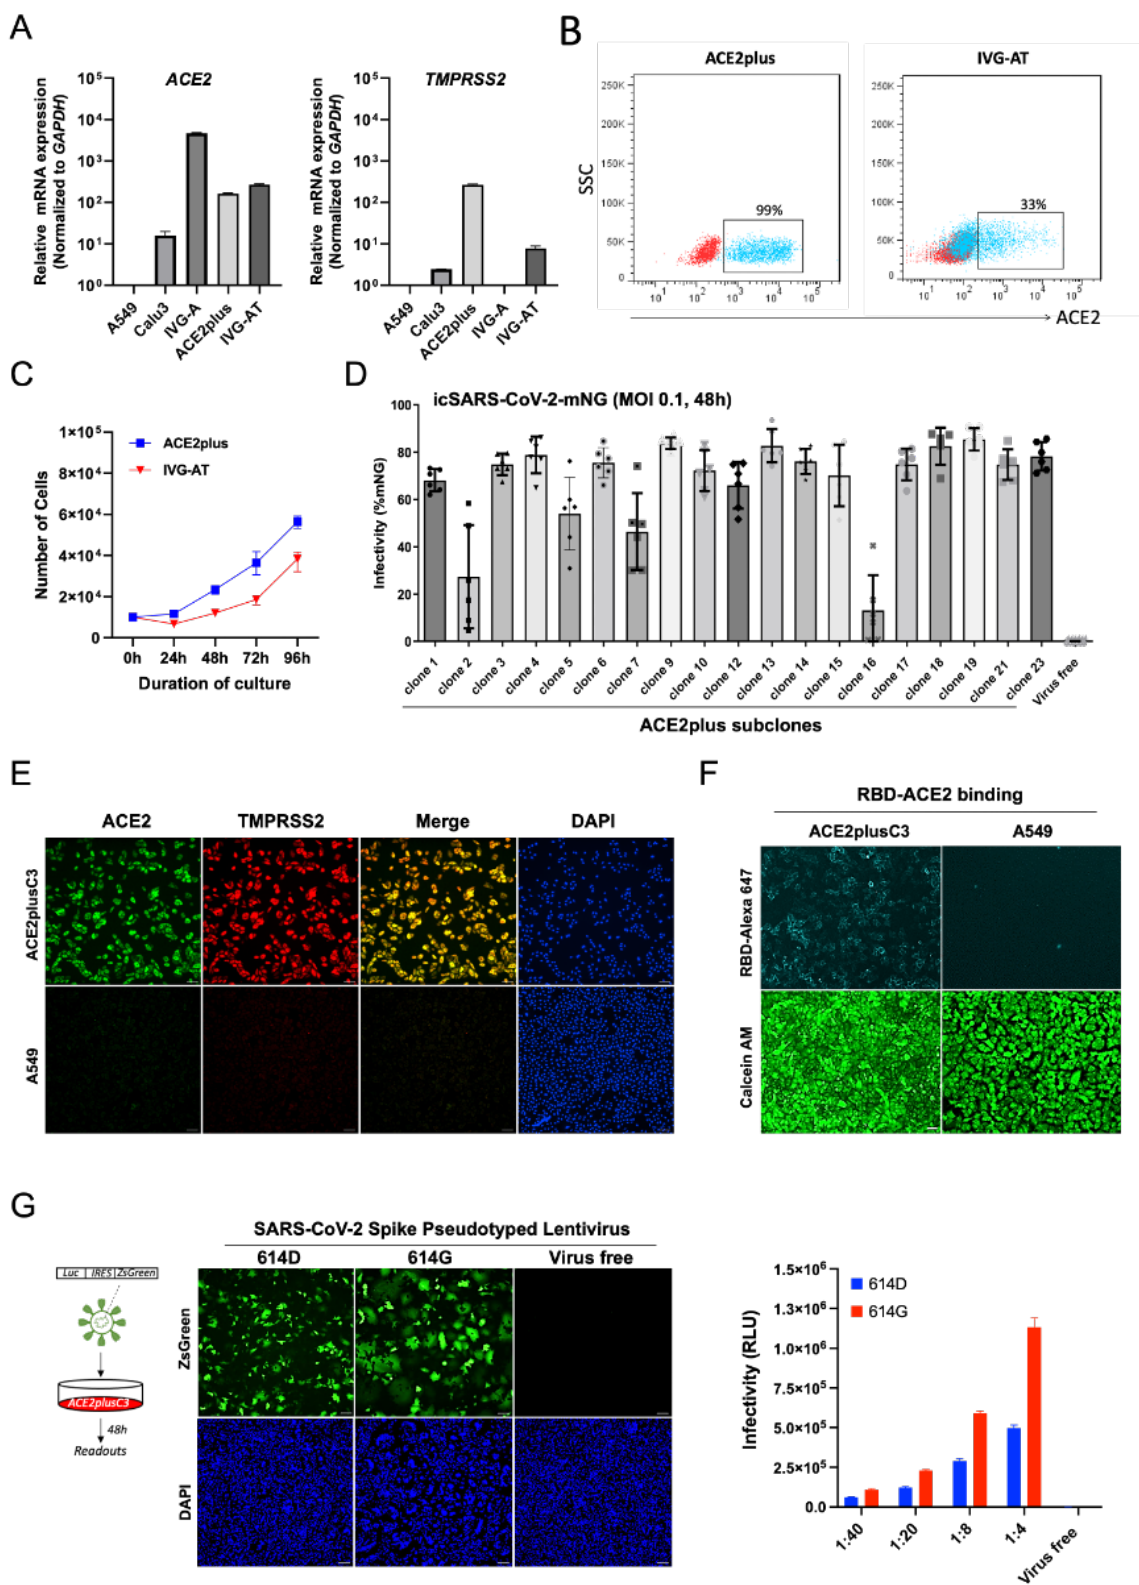

538

539

540



541 **Fig. 2. Characterization of ACE2plus cell model and its subclone ACE2plusC3.**

542 (A) The mRNA expression levels of ACE2 and TMPRSS2 in indicated cell lines were measured  
543 by RT-qPCR. A549<sup>ACE2</sup> (IVG-A) and A549<sup>ACE2/TMPRSS2</sup> (IVG-A/T) are commercial cell lines used  
544 as a control (B). The cell surface ACE2 expression level was measured by flow cytometry using  
545 live cells. (C) Cell number at different time points was evaluated by DAPI counting using Celigo  
546 Image Cytometer. (D) Single-cell derived clones were generated through FACS sorting using  
547 ACE2-specific antibody. Following expansion, clones derived from ACE2plus cells were infected  
548 with icSARS-CoV2-mNG virus to determine their infectivity. (E) The expression of ACE2 and  
549 TMPRSS2 proteins in clone 3 (ACE2plusC3) was examined by immunofluorescence microscopy  
550 (10x magnification). (F) RBD/ACE2 binding in living cells. Recombinant SARS-CoV-2 Spike  
551 RBD proteins were labeled using Alexa Fluo 647 Labeling Kit (ThermoFisher Scientific) and  
552 incubated with cells on ice for 30 minutes. RBD-Alexa 647 signal was detected by Celigo Image  
553 Cytometer. Calcein AM was used to detect living cells. (G) ACE2plusC3 cells are infectable with  
554 SARS-CoV-2 Spike-pseudotyped lentivirus (PV). Microscope images of ZsGreen expression in  
555 ACE2plusC3 at 48 hours post-incubation with 614D or 614G PV. A series of diluted virus was  
556 applied, and infectivity was measured via relative luciferase units (RLU). Each data represents  
557 the mean and standard deviation. 100uM scale bar.

558

559

560

561

562

563

564

565

566

567

568

569

570

A

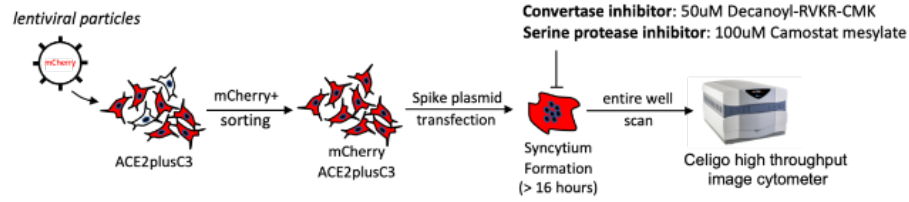

B

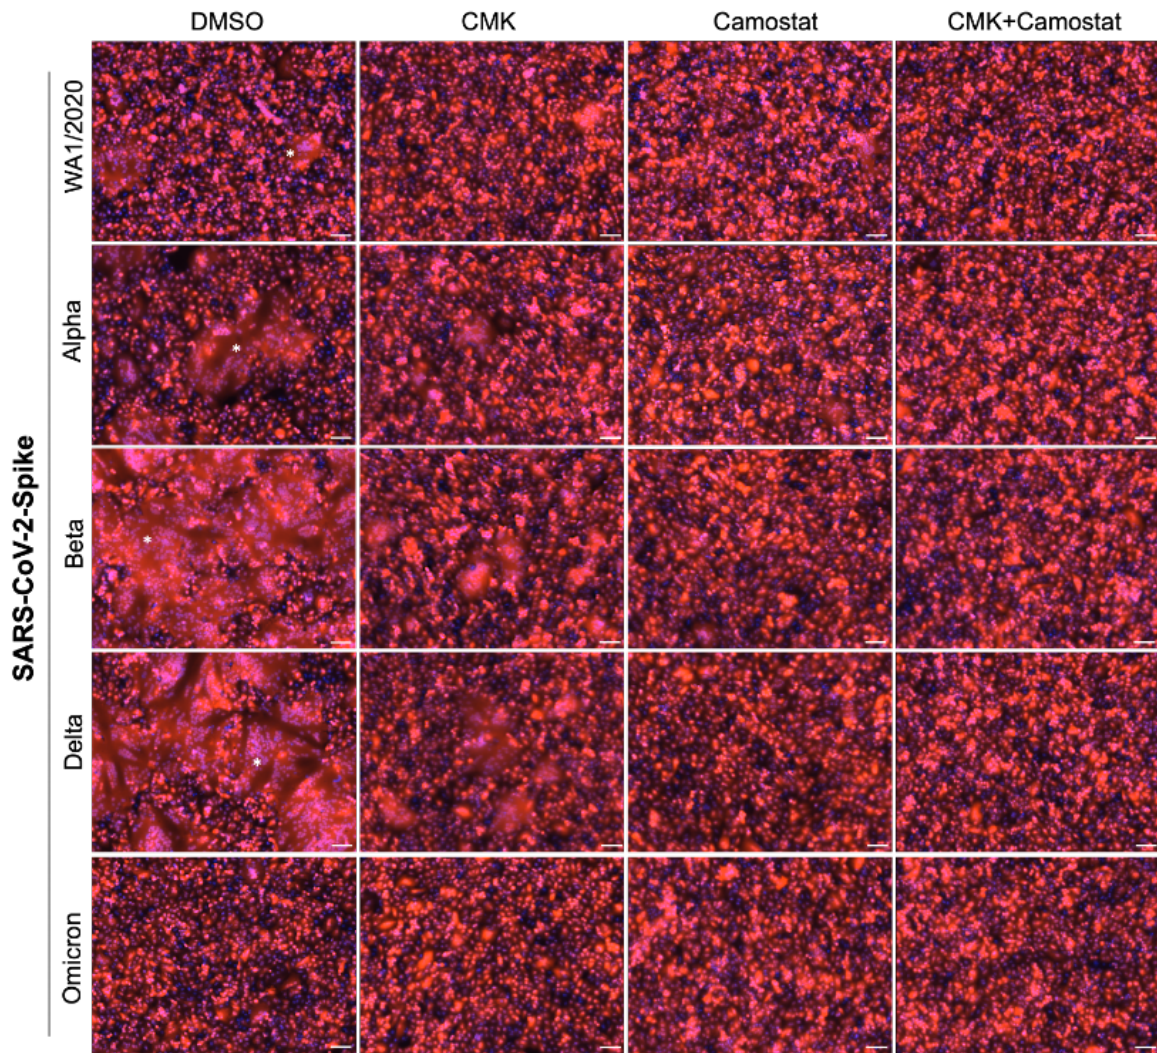

24 hours post transfection

571

572

573

574

575

576

577 **Fig. 3. SARS-CoV-2-Spike-mediated syncytium formation in ACE2plusC3 cells.**

578 (A) Experimental scheme to observe syncytium formation. To visualize and capture whole well  
579 images, an entire 24-well plate was scanned (B) Representative images from two independent  
580 experiments. SARS-CoV-2 Spike plasmids were transfected into cells with or without protease  
581 inhibitor treatment. After 24 hours, cells were fixed and scanned using Celigo Image Cytometer.  
582 mCherry and DAPI images were merged by Celigo Software. 100uM scale bar. Star shows the  
583 area of the syncytium.

584

585

586

587

588

589

590

591

592

593

594

595

596

597

598

599

600

601

602

603

604

605

606

607

608



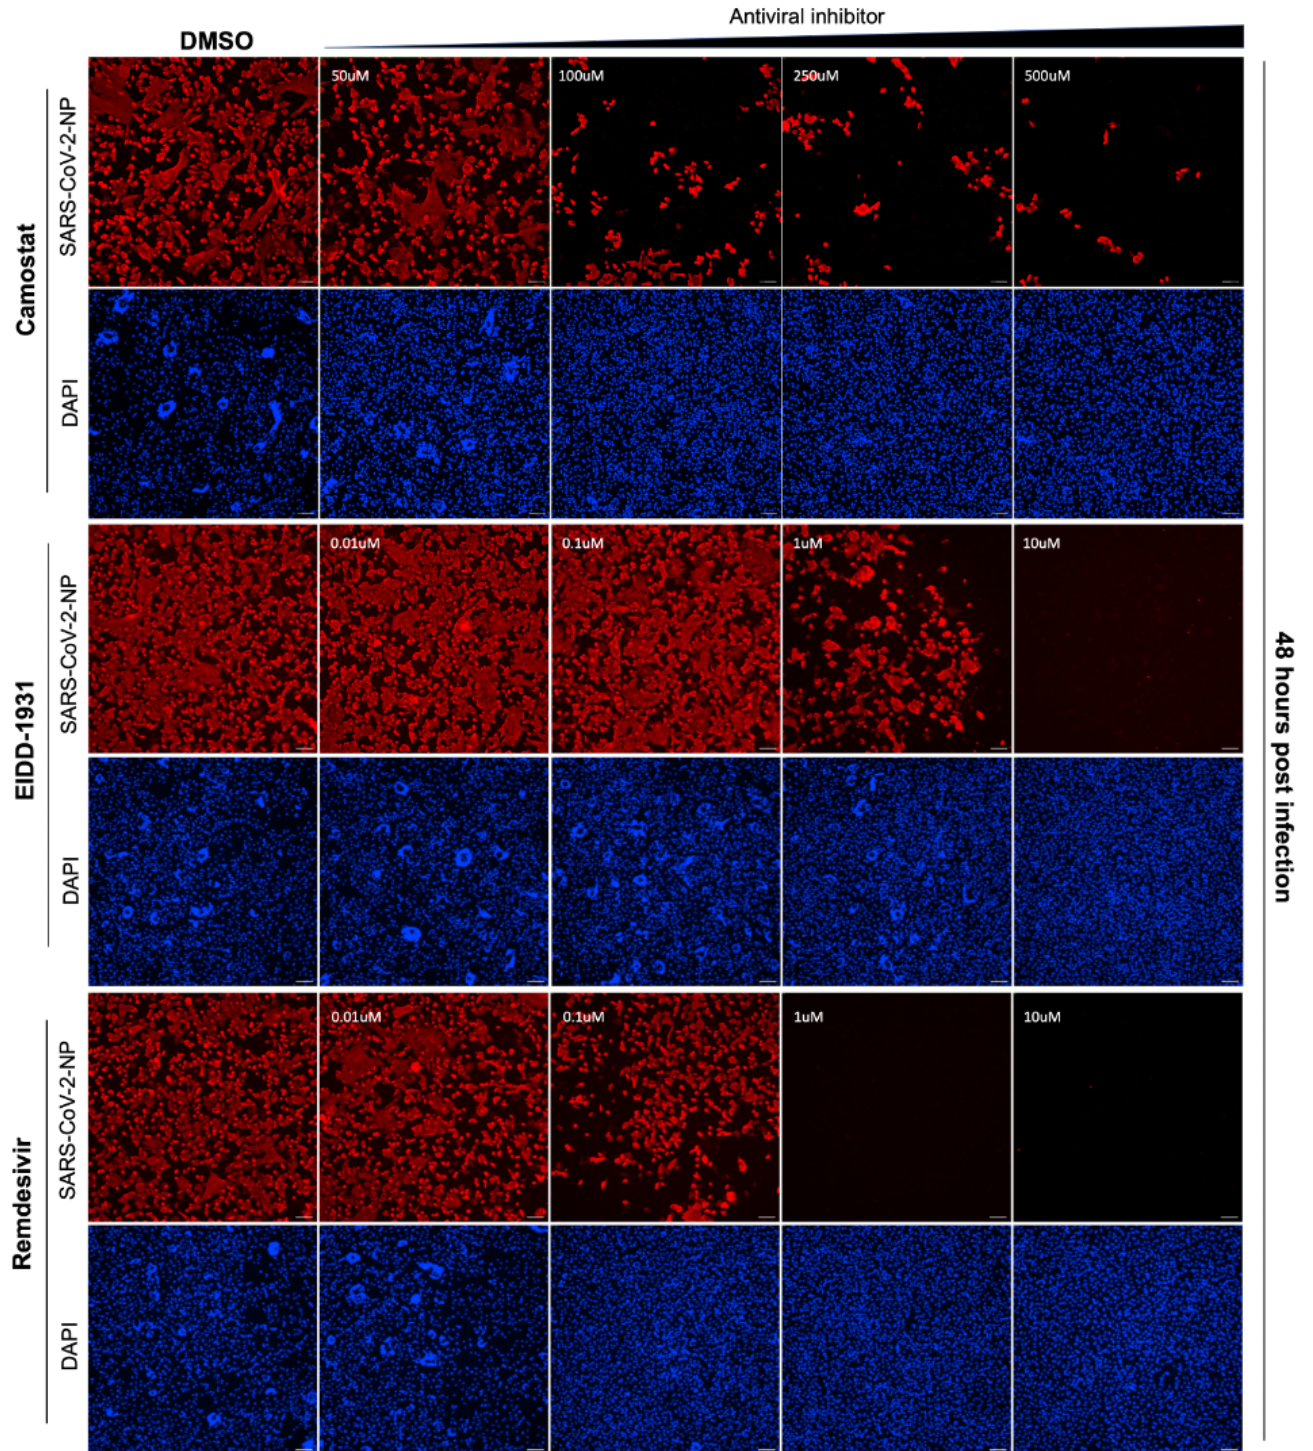

609

610

611

612 **Fig. 4 Dose-dependent inhibition in SARS-CoV-2 infection.**

613 Representative images from two independent experiments. Cells were plated in a 96-well plate  
614 overnight as described in materials and methods. The next day, cells were infected with icSARS-  
615 CoV-2-mNG at MOI 0.1 and treated with a range of concentrations of antiviral drugs for 48  
616 hours. After that, cells were fixed and stained with anti-NP antibody, followed by secondary  
617 antibody incubation (conjugated with Alexa-594). DAPI was used for nuclear counterstain.  
618 Images were scanned by ImageXpress using 10x magnification, 100uM scale bar.

619

620

621

622

623

624

625

626

627

628

629

630

631

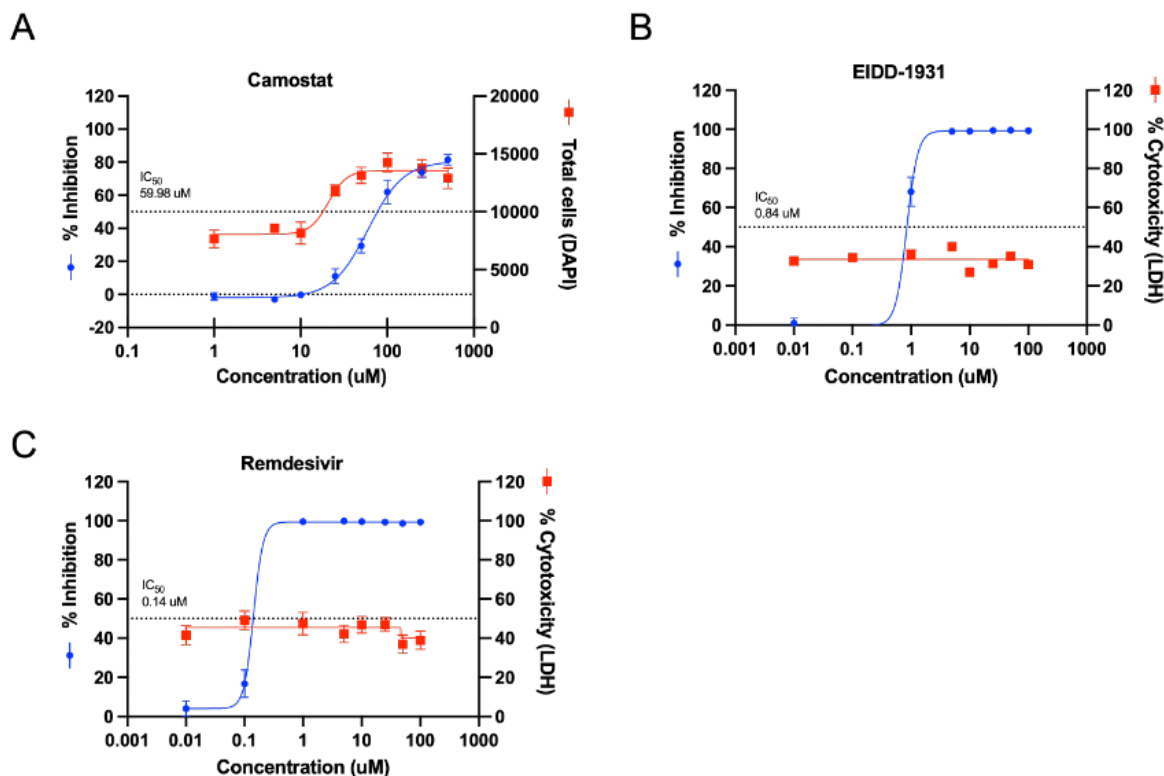

632

633

634 **Fig. 5 Antiviral efficacy of Camostat, Remdesivir and EIDD1931 in ACE2plusC3.** Cells were

635 infected with icSARS-CoV-2-mNG at MOI 0.1 and treated with a range of concentrations of

636 antiviral drugs for 48 hours. Supernatants were collected for LDH cytotoxicity assay. Fixed cells

637 were stained with anti-NP antibody, followed by secondary antibody incubation (conjugated with

638 Alexa-594). DAPI was used for counterstain. The images were acquired with the ImageXpress

639 system by immunofluorescence with 4x and processed by MetaXpress Software to calculate the

640 infectivity. GraphPad was used to draw the dose-response curve and determine the  $IC_{50}$ . The data

641 represent the mean ( $\pm$ SD) from two independent experiments.

642

643

644

645

646

647

648

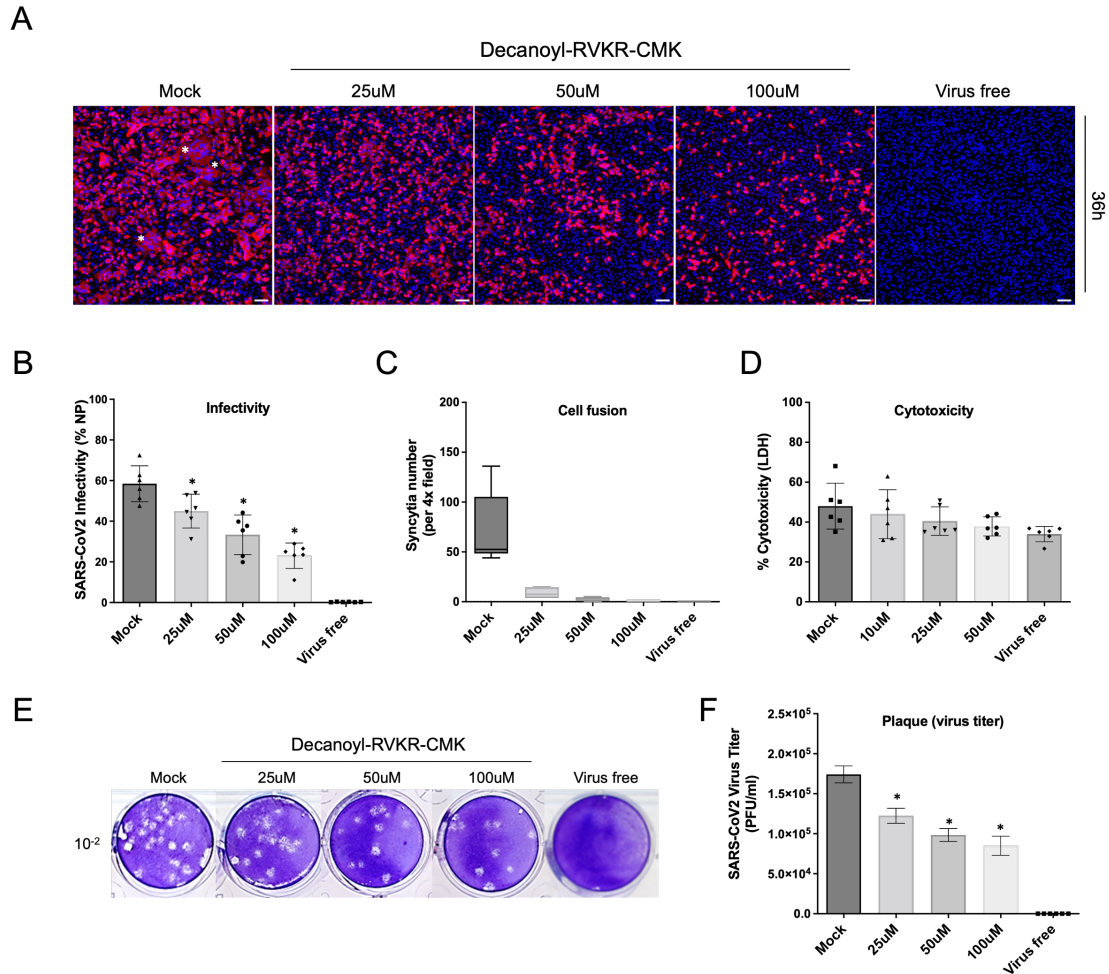

649

650

651 **Fig. 6. Decanoyl-RVKR-CMK inhibits SARS-CoV2 infectivity by suppressing Spike-**

652 **mediated cell fusion in ACE2plusC3.** (A) Microscope images showing viral

653 nucleocapsid protein expression (red) in infected cells, DAPI (blue) was used for nuclear

654 counterstain. Images were scanned by ImageXpress using 10x magnification. Cells were infected

655 with WA1/2020 strain at an MOI of 0.1 in the presence of furin inhibitor drug dilutions for 36

656 hours. (B, C) Quantifying the virus infectivity and syncytia number via ImageXpress, Syncytia

657 were determined based on the size (> 100uM) and the number of nuclei (> 5). (D) Cytotoxicity

658 was measured by LDH assay. (E) Plaque assay. Supernatants were collected at the 36-hour

659 timepoint post-infection. (F) Virus titer was quantified from plaque numbers. Data are

660 representative of the mean and SEM of two independent experiments ( $P^* < 0.05$ ). Star shows the

661 area of the syncytium.

662

663
